# Supplementary material for: Gobelinite, the Co analogue of ktenasite from Cap Garonne, France, and Eisenzecher Zug, Germany
Source: Copernicus journal article supplement (doi:10.5194/ejm-32-637-2020), 2020-11-25

# checkCIF/PLATON report

Structure factors have been supplied for datablock(s) p78bkten\_a2

THIS REPORT IS FOR GUIDANCE ONLY. IF USED AS PART OF A REVIEW PROCEDURE FOR PUBLICATION, IT SHOULD NOT REPLACE THE EXPERTISE OF AN EXPERIENCED CRYSTALLOGRAPHIC REFEREE.

No syntax errors found.      CIF dictionary      Interpreting this report

## Datablock: p78bkten\_a2

---

Bond precision:    S- O = 0.0018 A                      Wavelength=0.71073

Cell:                      a=5.5990(11)              b=6.0840(12)              c=23.676(5)  
                            alpha=90                      beta=95.22(3)              gamma=90  
Temperature:              100 K

|                | Calculated                                                   | Reported                                                     |
|----------------|--------------------------------------------------------------|--------------------------------------------------------------|
| Volume         | 803.2(3)                                                     | 803.2(3)                                                     |
| Space group    | P 21/c                                                       | P 21/c                                                       |
| Hall group     | -P 2ybc                                                      | ?                                                            |
| Moiety formula | Cu7.60 H12 O28 S4 Zn0.40,<br>Co1.24 H24 Ni0.64 O12<br>Zn0.12 | Cu7.60 H12 O28 S4 Zn0.40,<br>Co1.24 H24 Ni0.64 O12<br>Zn0.12 |
| Sum formula    | Co1.24 Cu7.60 H36 Ni0.64<br>O40 S4 Zn0.52                    | Co1.24 Cu7.60 H36 Ni0.64<br>O40 S4 Zn0.52                    |
| Mr             | 1432.15                                                      | 1432.15                                                      |
| Dx,g cm-3      | 2.961                                                        | 2.961                                                        |
| Z              | 1                                                            | 1                                                            |
| Mu (mm-1)      | 6.694                                                        | 6.694                                                        |
| F000           | 707.4                                                        | 707.0                                                        |
| F000'          | 711.51                                                       |                                                              |
| h,k,lmax       | 8,9,35                                                       | 8,8,33                                                       |
| Nref           | 2848                                                         | 2419                                                         |
| Tmin,Tmax      | 0.935,0.987                                                  | 0.936,0.987                                                  |
| Tmin'          | 0.935                                                        |                                                              |

Correction method= # Reported T Limits: Tmin=0.936 Tmax=0.987  
AbsCorr = MULTI-SCAN

Data completeness= 0.849                      Theta(max)= 32.250

R(reflections)= 0.0310( 2387)              wR2(reflections)= 0.0831( 2419)

S = 1.066                      Npar= 152

---

The following ALERTS were generated. Each ALERT has the format

**test-name\_ALERT\_alert-type\_alert-level.**

Click on the hyperlinks for more details of the test.

---

**Alert level B**

|                   |                                        |    |      |           |              |
|-------------------|----------------------------------------|----|------|-----------|--------------|
| PLAT420_ALERT_2_B | D-H Without Acceptor                   | O3 | --H3 | .         | Please Check |
| PLAT973_ALERT_2_B | Check Calcd Positive Resid. Density on |    | Zn2  | 1.53 eA-3 |              |
| PLAT973_ALERT_2_B | Check Calcd Positive Resid. Density on |    | Cu2  | 1.53 eA-3 |              |

---

**Alert level C**

|                   |                                                  |       |         |           |              |
|-------------------|--------------------------------------------------|-------|---------|-----------|--------------|
| PLAT077_ALERT_4_C | Unitcell Contains Non-integer Number of Atoms .. |       |         |           | Please Check |
| PLAT911_ALERT_3_C | Missing FCF Refl Between Thmin & STh/L=          | 0.600 |         |           | 7 Report     |
| PLAT971_ALERT_2_C | Check Calcd Resid. Dens.                         | 1.14A | From Zn |           | 1.52 eA-3    |
| PLAT973_ALERT_2_C | Check Calcd Positive Resid. Density on           |       | Cu1     | 1.45 eA-3 |              |
| PLAT973_ALERT_2_C | Check Calcd Positive Resid. Density on           |       | Zn1     | 1.45 eA-3 |              |
| PLAT975_ALERT_2_C | Check Calcd Resid. Dens.                         | 0.81A | From O6 |           | 0.48 eA-3    |
| PLAT976_ALERT_2_C | Check Calcd Resid. Dens.                         | 0.81A | From O9 |           | -0.52 eA-3   |
| PLAT976_ALERT_2_C | Check Calcd Resid. Dens.                         | 1.03A | From O4 |           | -0.45 eA-3   |
| PLAT977_ALERT_2_C | Check Negative Difference Density on H2          |       |         |           | -0.33 eA-3   |
| PLAT977_ALERT_2_C | Check Negative Difference Density on H91         |       |         |           | -0.42 eA-3   |

---

**Alert level G**

|                   |                                                  |       |                |      |              |
|-------------------|--------------------------------------------------|-------|----------------|------|--------------|
| ABSMU01_ALERT_1_G | Calculation of _exptl_absorpt_correction_mu      |       |                |      |              |
|                   | not performed for this radiation type.           |       |                |      |              |
| PLAT002_ALERT_2_G | Number of Distance or Angle Restraints on AtSite |       |                | 13   | Note         |
| PLAT004_ALERT_5_G | Polymeric Structure Found with Maximum Dimension |       |                | 2    | Info         |
| PLAT005_ALERT_5_G | No Embedded Refinement Details Found in the CIF  |       |                |      | Please Do !  |
| PLAT066_ALERT_1_G | Predicted and Reported Tmin&Tmax Range Identical |       |                | ?    | Check        |
| PLAT068_ALERT_1_G | Reported F000 Differs from Calcd (or Missing)... |       |                |      | Please Check |
| PLAT300_ALERT_4_G | Atom Site Occupancy of Cu1                       |       | Constrained at | 0.95 | Check        |
| PLAT300_ALERT_4_G | Atom Site Occupancy of Cu2                       |       | Constrained at | 0.95 | Check        |
| PLAT300_ALERT_4_G | Atom Site Occupancy of Zn1                       |       | Constrained at | 0.05 | Check        |
| PLAT300_ALERT_4_G | Atom Site Occupancy of Zn2                       |       | Constrained at | 0.05 | Check        |
| PLAT300_ALERT_4_G | Atom Site Occupancy of Zn                        |       | Constrained at | 0.06 | Check        |
| PLAT300_ALERT_4_G | Atom Site Occupancy of Co                        |       | Constrained at | 0.62 | Check        |
| PLAT300_ALERT_4_G | Atom Site Occupancy of Ni                        |       | Constrained at | 0.32 | Check        |
| PLAT301_ALERT_3_G | Main Residue Disorder .....(Resd 1 )             |       |                | 20%  | Note         |
| PLAT302_ALERT_4_G | Anion/Solvent/Minor-Residue Disorder (Resd 2 )   |       |                | 25%  | Note         |
| PLAT860_ALERT_3_G | Number of Least-Squares Restraints .....         |       |                | 8    | Note         |
| PLAT899_ALERT_4_G | SHELXL97 is Deprecated and Succeeded by SHELXL   |       |                | 2018 | Note         |
| PLAT910_ALERT_3_G | Missing # of FCF Reflection(s) Below Theta(Min). |       |                | 2    | Note         |
| PLAT912_ALERT_4_G | Missing # of FCF Reflections Above STh/L=        | 0.600 |                | 391  | Note         |
| PLAT913_ALERT_3_G | Missing # of Very Strong Reflections in FCF .... |       |                | 1    | Note         |
| PLAT952_ALERT_5_G | Calculated (ThMax) and CIF-Reported Lmax Differ  |       |                | 2    | Units        |
| PLAT958_ALERT_1_G | Calculated (ThMax) and Actual (FCF) Lmax Differ  |       |                | 2    | Units        |
| PLAT992_ALERT_5_G | Repd & Actual _reflns_number_gt Values Differ by |       |                | 1    | Check        |

---

0 **ALERT level A** = Most likely a serious problem - resolve or explain

3 **ALERT level B** = A potentially serious problem, consider carefully

10 **ALERT level C** = Check. Ensure it is not caused by an omission or oversight

23 **ALERT level G** = General information/check it is not something unexpected

4 **ALERT type 1** CIF construction/syntax error, inconsistent or missing data

12 ALERT type 2 Indicator that the structure model may be wrong or deficient  
5 ALERT type 3 Indicator that the structure quality may be low  
11 ALERT type 4 Improvement, methodology, query or suggestion  
4 ALERT type 5 Informative message, check

---

It is advisable to attempt to resolve as many as possible of the alerts in all categories. Often the minor alerts point to easily fixed oversights, errors and omissions in your CIF or refinement strategy, so attention to these fine details can be worthwhile. In order to resolve some of the more serious problems it may be necessary to carry out additional measurements or structure refinements. However, the purpose of your study may justify the reported deviations and the more serious of these should normally be commented upon in the discussion or experimental section of a paper or in the "special\_details" fields of the CIF. checkCIF was carefully designed to identify outliers and unusual parameters, but every test has its limitations and alerts that are not important in a particular case may appear. Conversely, the absence of alerts does not guarantee there are no aspects of the results needing attention. It is up to the individual to critically assess their own results and, if necessary, seek expert advice.

### **Publication of your CIF in IUCr journals**

A basic structural check has been run on your CIF. These basic checks will be run on all CIFs submitted for publication in IUCr journals (*Acta Crystallographica*, *Journal of Applied Crystallography*, *Journal of Synchrotron Radiation*); however, if you intend to submit to *Acta Crystallographica Section C* or *E* or *IUCrData*, you should make sure that full publication checks are run on the final version of your CIF prior to submission.

### **Publication of your CIF in other journals**

Please refer to the *Notes for Authors* of the relevant journal for any special instructions relating to CIF submission.

---

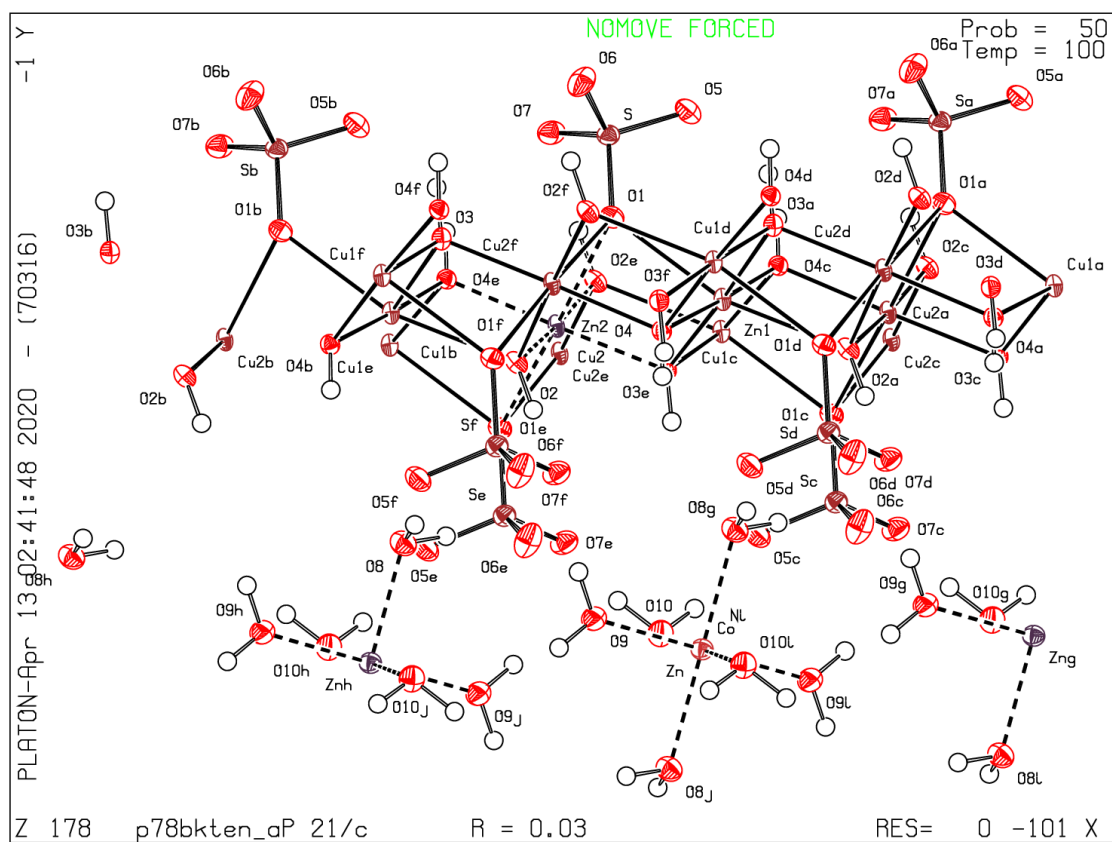

Supplement: Supplementary file 1 [file ejm-32-637-2020-supplement.zip › gobelinite cap garonne checkcif report.pdf]
