# Supplementary material for: Gobelinite, the Co analogue of ktenasite from Cap Garonne, France, and Eisenzecher Zug, Germany
Source: Copernicus journal article supplement (doi:10.5194/ejm-32-637-2020), 2020-11-25
Supplement: Supplementary file 1 [file ejm-32-637-2020-supplement.zip]

Archive with 6 entries (6 files):
- ejm-32-637-2020-supplement-title-page.pdf
- gobelinite cap garonne checkcif report.pdf
- Gobelinite ms (EJM template) 16 April 2020 suppliment.docx
- gobelinite Eisenzecher Zug checkcif report.pdf
- gobelinite Eisenzecher Zug.cif
- gobelinite cap garonne.cif
