# Supplementary material for: Gobelinite, the Co analogue of ktenasite from Cap Garonne, France, and Eisenzecher Zug, Germany
Source: Copernicus journal article supplement (doi:10.5194/ejm-32-637-2020), 2020-11-25
Supplement: Supplementary file 1 [file ejm-32-637-2020-supplement.zip › ejm-32-637-2020-supplement-title-page.pdf]

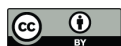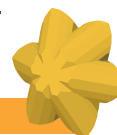

*Supplement of*

**Gobelinite, the Co analogue of ktenasite from Cap Garonne, France,  
and Eisenzecher Zug, Germany**

**Stuart J. Mills et al.**

*Correspondence to:* Stuart J. Mills ([smills@museum.vic.gov.au](mailto:smills@museum.vic.gov.au))

- [ejm-32-637-2020-supplement-title-page.pdf](#)
- [Gobelinite ms \(EJM template\) 16 April 2020 suppliment.docx](#)
- [gobelinite Eisenzecher Zug checkcif report.pdf](#)
- [gobelinite Eisenzecher Zug.cif](#)
- [gobelinite cap garonne checkcif report.pdf](#)
- [gobelinite cap garonne.cif](#)

The copyright of individual parts of the supplement might differ from the CC BY 4.0 License.
