# Supplementary material for: Gobelinite, the Co analogue of ktenasite from Cap Garonne, France, and Eisenzecher Zug, Germany
Source: Copernicus journal article supplement (doi:10.5194/ejm-32-637-2020), 2020-11-25
Supplement: Supplementary file 1 [file ejm-32-637-2020-supplement.zip › gobelinite Eisenzecher Zug checkcif report.pdf]

# checkCIF/PLATON report

You have not supplied any structure factors. As a result the full set of tests cannot be run.

THIS REPORT IS FOR GUIDANCE ONLY. IF USED AS PART OF A REVIEW PROCEDURE FOR PUBLICATION, IT SHOULD NOT REPLACE THE EXPERTISE OF AN EXPERIENCED CRYSTALLOGRAPHIC REFEREE.

No syntax errors found.      CIF dictionary      Interpreting this report

## Datablock: cokte

---

Bond precision:    S- O = 0.0020 A                      Wavelength=0.71073

Cell:                      a=5.611(1)              b=6.103(1)              c=23.808(5)  
                            alpha=90              beta=95.18(3)              gamma=90  
Temperature:              293 K

|                | Calculated                                 | Reported                                  |
|----------------|--------------------------------------------|-------------------------------------------|
| Volume         | 812.0(3)                                   | 811.9(3)                                  |
| Space group    | P 21/c                                     | P 21/c                                    |
| Hall group     | -P 2ybc                                    | -P 2ybc                                   |
| Moiety formula | 2(Cu4 H6 O14 S2), Co1.80<br>H24 Ni0.20 O12 | Cu8.00 H12 O28 S4, Co1.8<br>H24 Ni0.2 O12 |
| Sum formula    | Co1.80 Cu8 H36 Ni0.20 O40<br>S4            | H18 Co0.90 Cu4 Ni0.10 O20<br>S2           |
| Mr             | 1430.74                                    | 715.33                                    |
| Dx, g cm-3     | 2.926                                      | 2.926                                     |
| Z              | 1                                          | 2                                         |
| Mu (mm-1)      | 6.530                                      | 6.530                                     |
| F000           | 706.2                                      | 706.0                                     |
| F000'          | 710.33                                     |                                           |
| h,k,lmax       | 7,8,33                                     | 7,8,33                                    |
| Nref           | 2371                                       | 2352                                      |
| Tmin,Tmax      | 0.683,0.721                                | 0.484,0.736                               |
| Tmin'          | 0.424                                      |                                           |

Correction method= # Reported T Limits: Tmin=0.484 Tmax=0.736  
AbsCorr = MULTI-SCAN

Data completeness= 0.992                      Theta(max)= 30.040

R(reflections)= 0.0289( 1998)              wR2(reflections)= 0.0629( 2352)

S = 1.084                      Npar= 161

---

The following ALERTS were generated. Each ALERT has the format

**test-name\_ALERT\_alert-type\_alert-level.**

Click on the hyperlinks for more details of the test.

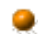

#### Alert level B

PLAT420\_ALERT\_2\_B D-H Without Acceptor O3 --H3 . Please Check

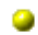

#### Alert level C

PLAT041\_ALERT\_1\_C Calc. and Reported SumFormula Strings Differ Please Check  
PLAT077\_ALERT\_4\_C Unitcell Contains Non-integer Number of Atoms .. Please Check  
PLAT199\_ALERT\_1\_C Reported \_cell\_measurement\_temperature ..... (K) 293 Check  
PLAT200\_ALERT\_1\_C Reported \_diffn\_ambient\_temperature ..... (K) 293 Check

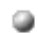

#### Alert level G

FORMU01\_ALERT\_1\_G There is a discrepancy between the atom counts in the  
\_chemical\_formula\_sum and \_chemical\_formula\_moiety. This is  
usually due to the moiety formula being in the wrong format.  
Atom count from \_chemical\_formula\_sum: H18 Co0.9 Cu4 Ni.1 O20 S2  
Atom count from \_chemical\_formula\_moiety:H36 Co1.8 Cu8 Ni0.2 O40 S4  
PLAT002\_ALERT\_2\_G Number of Distance or Angle Restraints on AtSite 15 Note  
PLAT004\_ALERT\_5\_G Polymeric Structure Found with Maximum Dimension 2 Info  
PLAT005\_ALERT\_5\_G No Embedded Refinement Details Found in the CIF Please Do !  
PLAT042\_ALERT\_1\_G Calc. and Reported MoietyFormula Strings Differ Please Check  
PLAT045\_ALERT\_1\_G Calculated and Reported Z Differ by a Factor ... 0.50 Check  
PLAT068\_ALERT\_1\_G Reported F000 Differs from Calcd (or Missing)... Please Check  
PLAT300\_ALERT\_4\_G Atom Site Occupancy of Co Constrained at 0.9 Check  
PLAT300\_ALERT\_4\_G Atom Site Occupancy of Ni Constrained at 0.1 Check  
PLAT302\_ALERT\_4\_G Anion/Solvent/Minor-Residue Disorder (Resd 2 ) 25% Note  
PLAT794\_ALERT\_5\_G Tentative Bond Valency for Cu1 (II) . 2.00 Info  
PLAT794\_ALERT\_5\_G Tentative Bond Valency for Cu2 (II) . 2.12 Info  
PLAT860\_ALERT\_3\_G Number of Least-Squares Restraints ..... 12 Note  
PLAT899\_ALERT\_4\_G SHELXL97 is Deprecated and Succeeded by SHELXL 2018 Note

- 
- 0 **ALERT level A** = Most likely a serious problem - resolve or explain  
1 **ALERT level B** = A potentially serious problem, consider carefully  
4 **ALERT level C** = Check. Ensure it is not caused by an omission or oversight  
14 **ALERT level G** = General information/check it is not something unexpected
- 7 ALERT type 1 CIF construction/syntax error, inconsistent or missing data  
2 ALERT type 2 Indicator that the structure model may be wrong or deficient  
1 ALERT type 3 Indicator that the structure quality may be low  
5 ALERT type 4 Improvement, methodology, query or suggestion  
4 ALERT type 5 Informative message, check
- 

### Validation response form

Please find below a validation response form (VRF) that can be filled in and pasted into your CIF.

# start Validation Reply Form

\_vrf\_PLAT041\_cokte

;

PROBLEM: Calc. and Reported SumFormula Strings Differ Please Check

RESPONSE: ...

;

\_vrf\_PLAT077\_cokte

;

```

PROBLEM: Unitcell Contains Non-integer Number of Atoms ..      Please Check
RESPONSE: ...
;
_vrf_PLAT199_cokte
;
PROBLEM: Reported _cell_measurement_temperature ..... (K)      293 Check
RESPONSE: ...
;
_vrf_PLAT200_cokte
;
PROBLEM: Reported _diffn_ambient_temperature ..... (K)      293 Check
RESPONSE: ...
;
# end Validation Reply Form

```

---

It is advisable to attempt to resolve as many as possible of the alerts in all categories. Often the minor alerts point to easily fixed oversights, errors and omissions in your CIF or refinement strategy, so attention to these fine details can be worthwhile. In order to resolve some of the more serious problems it may be necessary to carry out additional measurements or structure refinements. However, the purpose of your study may justify the reported deviations and the more serious of these should normally be commented upon in the discussion or experimental section of a paper or in the "special\_details" fields of the CIF. checkCIF was carefully designed to identify outliers and unusual parameters, but every test has its limitations and alerts that are not important in a particular case may appear. Conversely, the absence of alerts does not guarantee there are no aspects of the results needing attention. It is up to the individual to critically assess their own results and, if necessary, seek expert advice.

### **Publication of your CIF in IUCr journals**

A basic structural check has been run on your CIF. These basic checks will be run on all CIFs submitted for publication in IUCr journals (*Acta Crystallographica*, *Journal of Applied Crystallography*, *Journal of Synchrotron Radiation*); however, if you intend to submit to *Acta Crystallographica Section C* or *E* or *IUCrData*, you should make sure that full publication checks are run on the final version of your CIF prior to submission.

### **Publication of your CIF in other journals**

Please refer to the *Notes for Authors* of the relevant journal for any special instructions relating to CIF submission.

---

**PLATON version of 22/12/2019; check.def file version of 13/12/2019**
