# Supplementary material for: Gobelinite, the Co analogue of ktenasite from Cap Garonne, France, and Eisenzecher Zug, Germany
Source: Copernicus journal article supplement (doi:10.5194/ejm-32-637-2020), 2020-11-25
Supplement: Supplementary file 1 [file ejm-32-637-2020-supplement.zip › gobelinite Eisenzecher Zug.cif]

 
data_cokte 
 
_audit_creation_method            SHELXL-97 
_chemical_name_systematic 
; 
 ? 
; 
_chemical_name_common             gobelinite 
_chemical_melting_point           ? 
_chemical_formula_moiety          'Cu8.00 H12 O28 S4, Co1.8 H24 Ni0.2 O12' 

_chemical_formula_sum 
 'H18 Co0.90 Cu4 Ni0.10 O20 S2' 
_chemical_formula_weight          715.33 
 
loop_ 
 _atom_type_symbol 
 _atom_type_description 
 _atom_type_scat_dispersion_real 
 _atom_type_scat_dispersion_imag 
 _atom_type_scat_source 
 'O'  'O'   0.0106   0.0060 
 'International Tables Vol C Tables 4.2.6.8 and 6.1.1.4' 
 'H'  'H'   0.0000   0.0000 
 'International Tables Vol C Tables 4.2.6.8 and 6.1.1.4' 
 'S'  'S'   0.1246   0.1234 
 'International Tables Vol C Tables 4.2.6.8 and 6.1.1.4' 
 'Cu'  'Cu'   0.3201   1.2651 
 'International Tables Vol C Tables 4.2.6.8 and 6.1.1.4' 
 'Co'  'Co'   0.3494   0.9721 
 'International Tables Vol C Tables 4.2.6.8 and 6.1.1.4' 
 'Ni'  'Ni'   0.3393   1.1124 
 'International Tables Vol C Tables 4.2.6.8 and 6.1.1.4' 
 
_symmetry_cell_setting            'monoclinic' 
_symmetry_space_group_name_H-M    'P 21/c'
_symmetry_space_group_name_Hall '-P 2ybc'
 
loop_ 
 _symmetry_equiv_pos_as_xyz 
 'x, y, z' 
 '-x, y+1/2, -z+1/2' 
 '-x, -y, -z' 
 'x, -y-1/2, z-1/2' 
 
_cell_length_a                    5.6110(10) 
_cell_length_b                    6.1030(10) 
_cell_length_c                    23.808(5) 
_cell_angle_alpha                 90.00 
_cell_angle_beta                  95.18(3) 
_cell_angle_gamma                 90.00 
_cell_volume                      811.9(3) 
_cell_formula_units_Z             2 
_cell_measurement_temperature     293(2) 
_cell_measurement_reflns_used     4609
_cell_measurement_theta_min       2.037  
_cell_measurement_theta_max       30.04 
 
_exptl_crystal_description        'fragment'
_exptl_crystal_colour             'pale green'
_exptl_crystal_size_max           0.13 
_exptl_crystal_size_mid           0.05 
_exptl_crystal_size_min           0.05 
_exptl_crystal_density_meas       ? 
_exptl_crystal_density_diffrn     2.926 
_exptl_crystal_density_method     'not measured' 
_exptl_crystal_F_000              706 
_exptl_absorpt_coefficient_mu     6.530 
_exptl_absorpt_correction_type    'multi-scan'
_exptl_absorpt_correction_T_min   0.4840 
_exptl_absorpt_correction_T_max   0.7360 
_exptl_absorpt_process_details 'HKL SCALEPACK (Otwinowski & Minor, 1997)' 
 
_exptl_special_details 
; 
 ? 
; 
 
_diffrn_ambient_temperature       293(2) 
_diffrn_radiation_wavelength      0.71073 
_diffrn_radiation_type            MoK\a 
_diffrn_radiation_source          'fine-focus sealed tube' 
_diffrn_radiation_monochromator   graphite 
_diffrn_measurement_device_type   'Nonius KappaCCD' 
_diffrn_measurement_method         '\f and \w scans' 
_diffrn_detector_area_resol_mean  ? 
_diffrn_standards_number          0
_diffrn_standards_interval_count  ? 
_diffrn_standards_interval_time   0
_diffrn_standards_decay_%         0
_diffrn_reflns_number             4402 
_diffrn_reflns_av_R_equivalents   0.0259 
_diffrn_reflns_av_sigmaI/netI     0.0388 
_diffrn_reflns_limit_h_min        -7 
_diffrn_reflns_limit_h_max        7 
_diffrn_reflns_limit_k_min        -8 
_diffrn_reflns_limit_k_max        8 
_diffrn_reflns_limit_l_min        -33 
_diffrn_reflns_limit_l_max        33 
_diffrn_reflns_theta_min          3.45 
_diffrn_reflns_theta_max          30.04 
_reflns_number_total              2352 
_reflns_number_gt                 1998 
_reflns_threshold_expression      'I>2\s(I)' 
 
_computing_data_collection         'COLLECT (Nonius, 2003)'  
_computing_cell_refinement  'HKL SCALEPACK (Otwinowski & Minor 1997)' 
_computing_data_reduction  'HKL DENZO, SCALEPACK (Otwinowski & Minor, 1997)' 
_computing_structure_solution     'SHELXS-97 (Sheldrick, 1997b)' 
_computing_structure_refinement   'SHELXL-97 (Sheldrick, 1997a)' 
_computing_molecular_graphics ?
_computing_publication_material   'SHELXL97 (Sheldrick, 1997a)' 
 
_refine_special_details 
; 
 Refinement of F^2^ against ALL reflections.  The weighted R-factor wR and 
 goodness of fit S are based on F^2^, conventional R-factors R are based 
 on F, with F set to zero for negative F^2^. The threshold expression of 
 F^2^ > 2sigma(F^2^) is used only for calculating R-factors(gt) etc. and is 
 not relevant to the choice of reflections for refinement.  R-factors based 
 on F^2^ are statistically about twice as large as those based on F, and R- 
 factors based on ALL data will be even larger. 
; 
 
_refine_ls_structure_factor_coef  Fsqd  
_refine_ls_matrix_type            full 
_refine_ls_weighting_scheme       calc  
_refine_ls_weighting_details 
 'calc w=1/[\s^2^(Fo^2^)+(0.0136P)^2^+0.9562P] where P=(Fo^2^+2Fc^2^)/3' 
_atom_sites_solution_primary      direct 
_atom_sites_solution_secondary    difmap 
_atom_sites_solution_hydrogens    geom 
_refine_ls_hydrogen_treatment     mixed 
_refine_ls_extinction_method      SHELXL 
_refine_ls_extinction_coef        0.0042(6) 
_refine_ls_extinction_expression 
 'Fc^*^=kFc[1+0.001xFc^2^\l^3^/sin(2\q)]^-1/4^' 
_refine_ls_number_reflns          2352 
_refine_ls_number_parameters      161 
_refine_ls_number_restraints      12 
_refine_ls_R_factor_all           0.0400 
_refine_ls_R_factor_gt            0.0289 
_refine_ls_wR_factor_ref          0.0629 
_refine_ls_wR_factor_gt           0.0599 
_refine_ls_goodness_of_fit_ref    1.084 
_refine_ls_restrained_S_all       1.093 
_refine_ls_shift/su_max           0.001 
_refine_ls_shift/su_mean          0.000 
 
loop_ 
 _atom_site_label 
 _atom_site_type_symbol 
 _atom_site_fract_x 
 _atom_site_fract_y 
 _atom_site_fract_z 
 _atom_site_U_iso_or_equiv 
 _atom_site_adp_type 
 _atom_site_occupancy 
 _atom_site_symetry_multiplicity 
 _atom_site_calc_flag 
 _atom_site_refinement_flags 
 _atom_site_disorder_assembly 
 _atom_site_disorder_group 
Co Co 0.0000 0.0000 0.0000 0.01809(13) Uani 0.90 2 d SP . . 
Ni Ni 0.0000 0.0000 0.0000 0.01809(13) Uani 0.10 2 d SP . . 
Cu1 Cu -0.00780(5) 0.10031(5) 0.248955(13) 0.01593(9) Uani 1 1 d . . . 
Cu2 Cu 0.49902(5) -0.15036(5) 0.247407(12) 0.01500(9) Uani 1 1 d . . . 
S S 0.36466(11) 0.05778(10) 0.37396(2) 0.01770(14) Uani 1 1 d . . . 
O1 O 0.3383(3) 0.0963(3) 0.31212(7) 0.0182(4) Uani 1 1 d . . . 
O2 O 0.6051(3) 0.1045(3) 0.20936(8) 0.0164(4) Uani 1 1 d D . . 
O3 O 0.8418(3) 0.3545(3) 0.28838(8) 0.0159(3) Uani 1 1 d D . . 
O4 O 0.1613(3) 0.3469(3) 0.21526(8) 0.0151(3) Uani 1 1 d D . . 
O5 O 0.1314(4) -0.0060(3) 0.39222(8) 0.0289(4) Uani 1 1 d . . . 
O6 O 0.4473(4) 0.2624(3) 0.40231(9) 0.0321(5) Uani 1 1 d . . . 
O7 O 0.5423(4) -0.1161(3) 0.38642(8) 0.0281(5) Uani 1 1 d . . . 
O8 O 0.9149(4) 0.0606(4) 0.08260(8) 0.0278(4) Uani 1 1 d D . . 
O9 O 0.3248(4) 0.1595(3) 0.01780(9) 0.0266(4) Uani 1 1 d D . . 
O10 O 0.1401(4) -0.2981(3) 0.02861(9) 0.0267(4) Uani 1 1 d D . . 
H2 H 0.562(6) 0.121(5) 0.1802(11) 0.025(10) Uiso 1 1 d D . . 
H3 H 0.863(7) 0.359(6) 0.3206(12) 0.043(11) Uiso 1 1 d D . . 
H4 H 0.153(7) 0.361(6) 0.1842(12) 0.038(11) Uiso 1 1 d D . . 
H81 H 0.895(6) 0.190(4) 0.0889(14) 0.035(10) Uiso 1 1 d D . . 
H82 H 0.800(6) -0.020(5) 0.0898(16) 0.050(12) Uiso 1 1 d D . . 
H91 H 0.421(8) 0.184(8) -0.0070(15) 0.093(18) Uiso 1 1 d D . . 
H92 H 0.361(6) 0.231(6) 0.0461(13) 0.047(11) Uiso 1 1 d D . . 
H101 H 0.259(5) -0.284(6) 0.0478(14) 0.039(10) Uiso 1 1 d D . . 
H102 H 0.032(6) -0.372(7) 0.0424(18) 0.073(15) Uiso 1 1 d D . . 
 
loop_ 
 _atom_site_aniso_label 
 _atom_site_aniso_U_11 
 _atom_site_aniso_U_22 
 _atom_site_aniso_U_33 
 _atom_site_aniso_U_23 
 _atom_site_aniso_U_13 
 _atom_site_aniso_U_12 
Co 0.0183(2) 0.0190(2) 0.0172(2) 0.00040(19) 0.00257(17) 0.0000(2) 
Ni 0.0183(2) 0.0190(2) 0.0172(2) 0.00040(19) 0.00257(17) 0.0000(2) 
Cu1 0.01189(16) 0.01209(16) 0.02411(17) 0.00024(11) 0.00325(12) -0.00024(11) 
Cu2 0.01049(15) 0.01217(16) 0.02275(17) 0.00021(11) 0.00382(11) -0.00084(11) 
S 0.0188(3) 0.0186(3) 0.0157(3) -0.0018(2) 0.0013(2) 0.0021(2) 
O1 0.0203(9) 0.0177(9) 0.0166(8) 0.0022(7) 0.0026(7) -0.0003(7) 
O2 0.0165(9) 0.0145(8) 0.0187(9) 0.0013(7) 0.0047(7) 0.0007(7) 
O3 0.0127(8) 0.0169(8) 0.0184(9) 0.0023(7) 0.0028(7) 0.0001(7) 
O4 0.0140(8) 0.0141(8) 0.0175(9) 0.0017(7) 0.0023(7) 0.0001(7) 
O5 0.0277(10) 0.0331(11) 0.0281(10) 0.0005(9) 0.0139(8) 0.0000(9) 
O6 0.0314(11) 0.0275(11) 0.0359(11) -0.0151(9) -0.0056(9) 0.0027(9) 
O7 0.0335(12) 0.0288(11) 0.0214(9) 0.0004(8) -0.0014(8) 0.0138(9) 
O8 0.0334(12) 0.0252(11) 0.0264(10) -0.0039(9) 0.0111(9) -0.0032(10) 
O9 0.0246(10) 0.0328(11) 0.0224(10) -0.0058(9) 0.0014(8) -0.0074(9) 
O10 0.0249(11) 0.0251(10) 0.0297(11) 0.0056(9) 0.0001(9) 0.0021(9) 
 
_geom_special_details 
; 
 All esds (except the esd in the dihedral angle between two l.s. planes) 
 are estimated using the full covariance matrix.  The cell esds are taken 
 into account individually in the estimation of esds in distances, angles 
 and torsion angles; correlations between esds in cell parameters are only 
 used when they are defined by crystal symmetry.  An approximate (isotropic) 
 treatment of cell esds is used for estimating esds involving l.s. planes. 
; 
 
loop_ 
 _geom_bond_atom_site_label_1 
 _geom_bond_atom_site_label_2 
 _geom_bond_distance 
 _geom_bond_site_symmetry_2 
 _geom_bond_publ_flag 
Co O10 2.072(2) . ? 
Co O10 2.072(2) 3 ? 
Co O9 2.076(2) 3 ? 
Co O9 2.076(2) . ? 
Co O8 2.098(2) 3_655 ? 
Co O8 2.098(2) 1_455 ? 
Cu1 O4 1.9866(18) . ? 
Cu1 O4 1.9980(18) 2_545 ? 
Cu1 O3 2.0146(18) 2_645 ? 
Cu1 O3 2.0355(18) 1_455 ? 
Cu1 O2 2.289(2) 1_455 ? 
Cu1 O1 2.346(2) . ? 
Cu1 Cu1 3.0530(5) 2_545 ? 
Cu1 Cu1 3.0530(5) 2 ? 
Cu2 O2 1.9212(18) . ? 
Cu2 O2 1.9357(18) 2_645 ? 
Cu2 O3 2.0221(19) 2_645 ? 
Cu2 O4 2.0289(19) 2_645 ? 
Cu2 O1 2.3380(18) 2_645 ? 
Cu2 O1 2.3884(18) . ? 
Cu2 Cu2 3.0540(5) 2_645 ? 
Cu2 Cu2 3.0540(5) 2_655 ? 
S O7 1.468(2) . ? 
S O5 1.468(2) . ? 
S O6 1.474(2) . ? 
S O1 1.4851(18) . ? 
O1 Cu2 2.3380(18) 2_655 ? 
O2 Cu2 1.9357(18) 2_655 ? 
O2 Cu1 2.289(2) 1_655 ? 
O2 H2 0.72(3) . ? 
O3 Cu1 2.0146(18) 2_655 ? 
O3 Cu2 2.0221(19) 2_655 ? 
O3 Cu1 2.0355(18) 1_655 ? 
O3 H3 0.77(3) . ? 
O4 Cu1 1.9980(18) 2 ? 
O4 Cu2 2.0289(19) 2_655 ? 
O4 H4 0.74(3) . ? 
O8 Ni 2.098(2) 1_655 ? 
O8 Co 2.098(2) 1_655 ? 
O8 H81 0.82(3) . ? 
O8 H82 0.84(3) . ? 
O9 H91 0.85(3) . ? 
O9 H92 0.81(3) . ? 
O10 H101 0.78(3) . ? 
O10 H102 0.85(3) . ? 
 
loop_ 
 _geom_angle_atom_site_label_1 
 _geom_angle_atom_site_label_2 
 _geom_angle_atom_site_label_3 
 _geom_angle 
 _geom_angle_site_symmetry_1 
 _geom_angle_site_symmetry_3 
 _geom_angle_publ_flag 
O10 Co O10 180.00(17) . 3 ? 
O10 Co O9 87.43(9) . 3 ? 
O10 Co O9 92.57(9) 3 3 ? 
O10 Co O9 92.57(9) . . ? 
O10 Co O9 87.43(9) 3 . ? 
O9 Co O9 180.00(16) 3 . ? 
O10 Co O8 92.39(8) . 3_655 ? 
O10 Co O8 87.61(8) 3 3_655 ? 
O9 Co O8 89.76(9) 3 3_655 ? 
O9 Co O8 90.24(9) . 3_655 ? 
O10 Co O8 87.61(8) . 1_455 ? 
O10 Co O8 92.39(8) 3 1_455 ? 
O9 Co O8 90.24(9) 3 1_455 ? 
O9 Co O8 89.76(9) . 1_455 ? 
O8 Co O8 180.00(17) 3_655 1_455 ? 
O4 Cu1 O4 176.99(3) . 2_545 ? 
O4 Cu1 O3 97.42(8) . 2_645 ? 
O4 Cu1 O3 81.15(8) 2_545 2_645 ? 
O4 Cu1 O3 80.91(8) . 1_455 ? 
O4 Cu1 O3 100.40(7) 2_545 1_455 ? 
O3 Cu1 O3 176.96(4) 2_645 1_455 ? 
O4 Cu1 O2 107.18(7) . 1_455 ? 
O4 Cu1 O2 75.79(7) 2_545 1_455 ? 
O3 Cu1 O2 106.63(7) 2_645 1_455 ? 
O3 Cu1 O2 76.33(7) 1_455 1_455 ? 
O4 Cu1 O1 82.46(7) . . ? 
O4 Cu1 O1 94.72(7) 2_545 . ? 
O3 Cu1 O1 83.46(7) 2_645 . ? 
O3 Cu1 O1 93.78(7) 1_455 . ? 
O2 Cu1 O1 164.55(7) 1_455 . ? 
O4 Cu1 Cu1 138.57(5) . 2_545 ? 
O4 Cu1 Cu1 39.85(5) 2_545 2_545 ? 
O3 Cu1 Cu1 41.34(5) 2_645 2_545 ? 
O3 Cu1 Cu1 140.06(5) 1_455 2_545 ? 
O2 Cu1 Cu1 92.44(4) 1_455 2_545 ? 
O1 Cu1 Cu1 87.61(4) . 2_545 ? 
O4 Cu1 Cu1 40.12(5) . 2 ? 
O4 Cu1 Cu1 141.22(5) 2_545 2 ? 
O3 Cu1 Cu1 137.54(5) 2_645 2 ? 
O3 Cu1 Cu1 40.82(5) 1_455 2 ? 
O2 Cu1 Cu1 91.16(5) 1_455 2 ? 
O1 Cu1 Cu1 88.80(4) . 2 ? 
Cu1 Cu1 Cu1 176.37(2) 2_545 2 ? 
O2 Cu2 O2 175.97(6) . 2_645 ? 
O2 Cu2 O3 96.36(8) . 2_645 ? 
O2 Cu2 O3 85.19(8) 2_645 2_645 ? 
O2 Cu2 O4 83.95(8) . 2_645 ? 
O2 Cu2 O4 94.43(8) 2_645 2_645 ? 
O3 Cu2 O4 178.89(7) 2_645 2_645 ? 
O2 Cu2 O1 95.46(7) . 2_645 ? 
O2 Cu2 O1 87.95(7) 2_645 2_645 ? 
O3 Cu2 O1 99.23(7) 2_645 2_645 ? 
O4 Cu2 O1 81.80(7) 2_645 2_645 ? 
O2 Cu2 O1 86.84(7) . . ? 
O2 Cu2 O1 89.68(7) 2_645 . ? 
O3 Cu2 O1 82.23(7) 2_645 . ? 
O4 Cu2 O1 96.73(7) 2_645 . ? 
O1 Cu2 O1 177.11(5) 2_645 . ? 
O2 Cu2 Cu2 145.88(6) . 2_645 ? 
O2 Cu2 Cu2 37.48(5) 2_645 2_645 ? 
O3 Cu2 Cu2 91.80(5) 2_645 2_645 ? 
O4 Cu2 Cu2 88.53(5) 2_645 2_645 ? 
O1 Cu2 Cu2 50.47(5) 2_645 2_645 ? 
O1 Cu2 Cu2 127.15(5) . 2_645 ? 
O2 Cu2 Cu2 37.81(5) . 2_655 ? 
O2 Cu2 Cu2 138.67(6) 2_645 2_655 ? 
O3 Cu2 Cu2 90.13(5) 2_645 2_655 ? 
O4 Cu2 Cu2 89.47(5) 2_645 2_655 ? 
O1 Cu2 Cu2 133.24(5) 2_645 2_655 ? 
O1 Cu2 Cu2 49.03(4) . 2_655 ? 
Cu2 Cu2 Cu2 175.39(2) 2_645 2_655 ? 
O7 S O5 110.83(12) . . ? 
O7 S O6 109.88(12) . . ? 
O5 S O6 109.94(12) . . ? 
O7 S O1 108.66(11) . . ? 
O5 S O1 108.88(12) . . ? 
O6 S O1 108.59(12) . . ? 
S O1 Cu2 134.12(11) . 2_655 ? 
S O1 Cu1 129.78(11) . . ? 
Cu2 O1 Cu1 87.16(6) 2_655 . ? 
S O1 Cu2 122.01(10) . . ? 
Cu2 O1 Cu2 80.49(6) 2_655 . ? 
Cu1 O1 Cu2 86.10(6) . . ? 
Cu2 O2 Cu2 104.71(9) . 2_655 ? 
Cu2 O2 Cu1 96.87(8) . 1_655 ? 
Cu2 O2 Cu1 96.34(8) 2_655 1_655 ? 
Cu2 O2 H2 119(3) . . ? 
Cu2 O2 H2 108(3) 2_655 . ? 
Cu1 O2 H2 128(3) 1_655 . ? 
Cu1 O3 Cu2 106.40(8) 2_655 2_655 ? 
Cu1 O3 Cu1 97.84(8) 2_655 1_655 ? 
Cu2 O3 Cu1 102.14(8) 2_655 1_655 ? 
Cu1 O3 H3 112(3) 2_655 . ? 
Cu2 O3 H3 119(3) 2_655 . ? 
Cu1 O3 H3 117(3) 1_655 . ? 
Cu1 O4 Cu1 100.03(8) . 2 ? 
Cu1 O4 Cu2 107.06(8) . 2_655 ? 
Cu1 O4 Cu2 103.35(8) 2 2_655 ? 
Cu1 O4 H4 120(3) . . ? 
Cu1 O4 H4 110(3) 2 . ? 
Cu2 O4 H4 114(3) 2_655 . ? 
Ni O8 Co 0.0 1_655 1_655 ? 
Ni O8 H81 113(2) 1_655 . ? 
Co O8 H81 113(2) 1_655 . ? 
Ni O8 H82 109(3) 1_655 . ? 
Co O8 H82 109(3) 1_655 . ? 
H81 O8 H82 114(3) . . ? 
Co O9 H91 123(3) . . ? 
Co O9 H92 125(3) . . ? 
H91 O9 H92 111(4) . . ? 
Co O10 H101 112(3) . . ? 
Co O10 H102 109(3) . . ? 
H101 O10 H102 116(3) . . ? 
 
_diffrn_measured_fraction_theta_max    0.992 
_diffrn_reflns_theta_full              30.04 
_diffrn_measured_fraction_theta_full   0.992 
_refine_diff_density_max    0.524 
_refine_diff_density_min   -0.665 
_refine_diff_density_rms    0.103 
