# Supplementary material for: Gobelinite, the Co analogue of ktenasite from Cap Garonne, France, and Eisenzecher Zug, Germany
Source: Copernicus journal article supplement (doi:10.5194/ejm-32-637-2020), 2020-11-25
Supplement: Supplementary file 1 [file ejm-32-637-2020-supplement.zip › Gobelinite ms (EJM template) 16 April 2020 suppliment.docx]

**Table S1.**

a) Anisotropic displacement parameters (Å2) for gobelinite from Cap Garonne.

| Site | *U*11 | *U*22 | *U*33 | *U*23 | *U*13 | *U*12 |
| --- | --- | --- | --- | --- | --- | --- |
| Co | 0.01480(17) | 0.01338(19) | 0.01285(17) | 0.00029(11) | 0.00160(12) | -0.00048(11) |
| Cu1 | 0.00844(15) | 0.00723(16) | 0.01501(15) | 0.00011(6) | 0.00197(10) | -0.00001(6) |
| Cu2 | 0.00817(15) | 0.00753(16) | 0.01537(15) | -0.00019(6) | 0.00293(10) | -0.00049(6) |
| S | 0.0150(2) | 0.0144(2) | 0.0125(2) | -0.00220(14) | 0.00081(14) | 0.00206(15) |
| O1 | 0.0164(6) | 0.0138(6) | 0.0139(6) | 0.0013(5) | 0.0032(5) | 0.0000(5) |
| O2 | 0.0148(6) | 0.0098(6) | 0.0151(6) | 0.0007(5) | 0.0054(5) | 0.0001(4) |
| O3 | 0.0108(6) | 0.0127(6) | 0.0142(6) | 0.0013(4) | 0.0012(5) | -0.0002(4) |
| O4 | 0.0110(6) | 0.0115(6) | 0.0117(6) | 0.0012(4) | 0.0017(5) | 0.0001(4) |
| O5 | 0.0199(7) | 0.0237(8) | 0.0184(6) | 0.0002(5) | 0.0074(5) | 0.0007(5) |
| O6 | 0.0220(7) | 0.0212(7) | 0.0302(8) | -0.0132(6) | -0.0057(6) | 0.0031(6) |
| O7 | 0.0222(7) | 0.0204(7) | 0.0159(6) | -0.0003(5) | -0.0006(5) | 0.0064(5) |
| O8 | 0.0208(7) | 0.0182(7) | 0.0187(6) | -0.0008(5) | 0.0051(5) | -0.0020(5) |
| O9 | 0.0186(6) | 0.0219(7) | 0.0168(6) | -0.0014(5) | 0.0010(5) | -0.0035(5) |
| O10 | 0.0190(6) | 0.0186(7) | 0.0196(6) | 0.0027(5) | 0.0011(5) | 0.0004(5) |

b) Anisotropic displacement parameters (Å2) for gobelinite from Eisenzecher Zug.

| Site | *U*11 | *U*22 | *U*33 | *U*23 | *U*13 | *U*12 |
| --- | --- | --- | --- | --- | --- | --- |
| Co | 0.0183(2) | 0.0190(2) | 0.0172(2) | 0.00040(19) | 0.00257(17) | 0.0000(2) |
| Cu1 | 0.01189(16) | 0.01209(16) | 0.02411(17) | 0.00024(11) | 0.00325(12) | -0.00024(11) |
| Cu2 | 0.01049(15) | 0.01217(16) | 0.02275(17) | 0.00021(11) | 0.00382(11) | -0.00084(11) |
| S | 0.0188(3) | 0.0186(3) | 0.0157(3) | -0.0018(2) | 0.0013(2) | 0.0021(2) |
| O1 | 0.0203(9) | 0.0177(9) | 0.0166(8) | 0.0022(7) | 0.0026(7) | -0.0003(7) |
| O2 | 0.0165(9) | 0.0145(8) | 0.0187(9) | 0.0013(7) | 0.0047(7) | 0.0007(7) |
| O3 | 0.0127(8) | 0.0169(8) | 0.0184(9) | 0.0023(7) | 0.0028(7) | 0.0001(7) |
| O4 | 0.0140(8) | 0.0141(8) | 0.0175(9) | 0.0017(7) | 0.0023(7) | 0.0001(7) |
| O5 | 0.0277(10) | 0.0331(11) | 0.0281(10) | 0.0005(9) | 0.0139(8) | 0.0000(9) |
| O6 | 0.0314(11) | 0.0275(11) | 0.0359(11) | -0.0151(9) | -0.0056(9) | 0.0027(9) |
| O7 | 0.0335(12) | 0.0288(11) | 0.0214(9) | 0.0004(8) | -0.0014(8) | 0.0138(9) |
| O8 | 0.0334(12) | 0.0252(11) | 0.0264(10) | -0.0039(9) | 0.0111(9) | -0.0032(10) |
| O9 | 0.0246(10) | 0.0328(11) | 0.0224(10) | -0.0058(9) | 0.0014(8) | -0.0074(9) |
| O10 | 0.0249(11) | 0.0251(10) | 0.0297(11) | 0.0056(9) | 0.0001(9) | 0.0021(9) |
